# Supplementary material
Source: PubMed Central journal article supplement (PMC4749366)

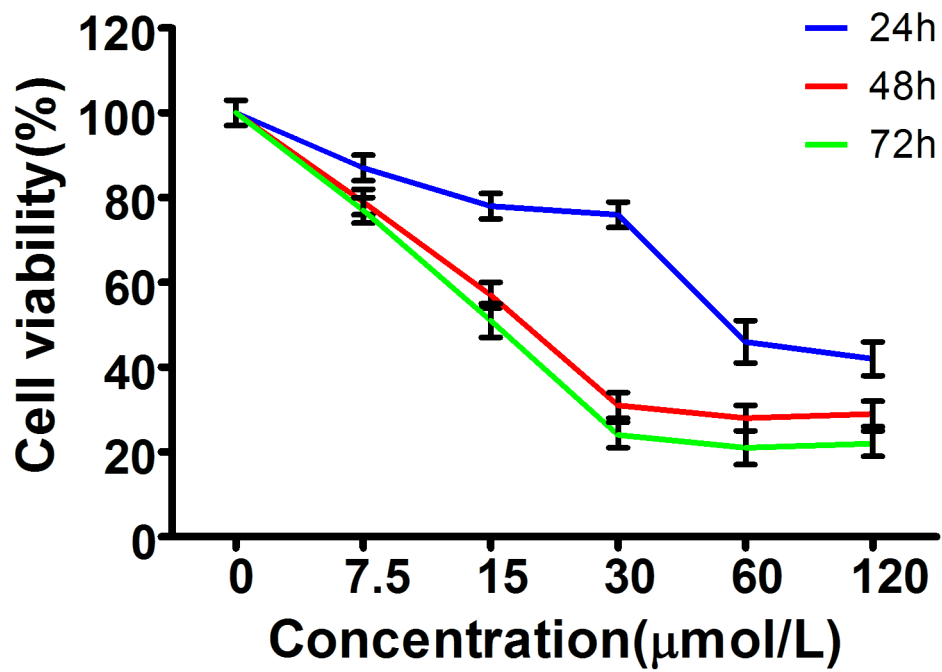

Supplementary Figure 1.

Baicalein showed cytotoxicity in the gastric cancer cell line MKN45.

Supplement: jcav07p0453s1.pdf [file jcav07p0453s1.pdf]
